# Supplementary material
Source: HighWire-hosted journal article supplement (https://www.cfp.ca/content/suppl/2011/07/07/57.7.777)
Supplement: MotheRisk.pdf [file MotheRisk.pdf]

# Edinburgh Postnatal Depression Scale

---

Name: \_\_\_\_\_ Address: \_\_\_\_\_

Your date of birth: \_\_\_\_\_

Baby's date of birth: \_\_\_\_\_ Telephone: \_\_\_\_\_

---

As you are pregnant or have recently had a baby, we would like to know how you are feeling. Please check the answer that comes closest to how you have felt **in the past 7 days**, not just how you feel today.

Here is an example, already completed.

I have felt happy

☐ Yes, all the time

☒ Yes, most of the time

☐ No, not very often

☐ No, not at all

This would mean "I have felt happy most of the time" during the past week.

Please complete the other questions in the same way.

In the past 7 days ...

1. I have been able to laugh and see the funny side of things

☐ As much as I always could

☐ Not quite so much now

☐ Definitely not so much now

☐ Not at all

\*6. Things have been getting on top of me

☐ Yes, most of the time I haven't been able to cope at all

☐ Yes, sometimes I haven't been coping as well as usual

☐ No, most of the time I have coped quite well

☐ No, I have been coping as well as ever

2. I have looked forward with enjoyment to things

☐ As much as I ever did

☐ Rather less than I used to

☐ Definitely less than I used to

☐ Hardly at all

\*7. I have been so unhappy that I have had difficulty sleeping

☐ Yes, most of the time

☐ Yes, sometimes

☐ Not very often

☐ No, not at all

\*3. I have blamed myself unnecessarily when things went wrong

☐ Yes, most of the time

☐ Yes, some of the time

☐ Not very often

☐ No, never

\*8. I have felt sad or miserable

☐ Yes, most of the time

☐ Yes, quite often

☐ Not very often

☐ No, not at all

4. I have been anxious or worried for no good reason

☐ No, not at all

☐ Hardly ever

☐ Yes, sometimes

☐ Yes, very often

\*9. I have been so unhappy that I have been crying

☐ Yes, most of the time

☐ Yes, quite often

☐ Only occasionally

☐ No, never

\*5. I have felt scared or panicky for no very good reason

☐ Yes, quite a lot

☐ Yes, sometimes

☐ No, not much

☐ No, not at all

\*10. The thought of harming myself has occurred to me

☐ Yes, quite often

☐ Sometimes

☐ Hardly ever

☐ Never

---

The total score is calculated by adding together the scores of each of the 10 items. Questions 1, 2, and 4 (without an asterisk) are scored 0, 1, 2, or 3, with the top box scored as 0 and the bottom box scored as 3. Questions 3 and 5 to 10 (marked with an asterisk) are reverse scored, with the top box scored as 3 and the bottom box scored as 0. Maximum score is 30.

Recommended follow-up to Edinburgh results is as follows.

- A score of 1–3 on item 10 indicates a risk of self-harm and requires immediate mental health assessment and intervention as appropriate.
- A score in the range of 11–13 indicates need for monitoring, support, and education.
- A score of  $\geq 14$  indicates need for follow-up with biopsychosocial diagnostic assessment for depression.

Reproduced from Cox JL, Holden JM, Sagovsky R. Detection of postnatal depression. Development of the 10-item Edinburgh Postnatal Depression Scale. *Br J Psychiatry* 1987;150:782–6.
